# Supplementary material for: Diplatinum(ii)-coordinated polyoxotungstate: synthesis, molecular structure, and photocatalytic performance for hydrogen evolution from water under visible-light irradiation
Source: Royal Society of Chemistry journal article supplement (doi:10.1039/c2dt30915g), 2012-01-01
Supplement: c2dt30915g.pdf [file c2dt30915g.pdf]

*Supporting information*

## **Diplatinum(II)-coordinated Polyoxotungstate: Synthesis, Molecular Structure, and Photocatalytic Performance for Hydrogen Evolution from Water under Visible-light Irradiation†**

**Chika Nozaki Kato, Yusuke Morii, Shota Hattori, Ryuta Nakayama, Yuki Makino, and Hidemitsu Uno**

Contents

**Table S1.** Bond lengths (Å) and angles (°) for **Cs-1**.

**Table S2.** Bond valence sum (BVS) for **Cs-1**.

**Fig. S1.** TG/DTA data for **Cs-1**.

**Fig. S2.** <sup>1</sup>H NMR spectra in DMSO-*d*<sub>6</sub> of as-prepared **Cs-1**.

**Fig. S3.** <sup>195</sup>Pt NMR spectrum in DMSO-*d*<sub>6</sub> of as-prepared **Me<sub>4</sub>N-1**. The <sup>195</sup>Pt NMR (129.02 MHz) spectrum was recorded in a tube (outer diameter: 5 mm) on a JEOL ECA-600 NMR spectrometer (Kyusyu University). The <sup>195</sup>Pt NMR spectrum measured in DMSO-*d*<sub>6</sub> was referenced to an external standard of K<sub>2</sub>PtCl<sub>4</sub> dissolved in D<sub>2</sub>O (δ = 0). The measurement was carried out with reference to the published works of cisplatin and its derivatives (J. Arpalatti, K. D. Klika, R. Sillanpää, R. Kivekäs, *J. Chem. Soc., Dalton Trans.*, **1998**, 1397 – 1402; M. Becker, R. E. Port, H.-J. Zabel, W. J. Zeller, P. Bachert, *J. Mag. Res.*, **1998**, *133*, 115 – 122).

**Fig. S4.** UV-vis spectrum of cisplatin (1.4 × 10<sup>-3</sup> M) in H<sub>2</sub>O in the range of 240 – 800 nm. Inset: in the range of 300 – 800 nm.

**Table S1.** Bond lengths (Å) and angles (°) for Cs-1.

| Lengths (Å) |     |           |     |     |           |
|-------------|-----|-----------|-----|-----|-----------|
| W1          | O1  | 1.712(14) | W1  | O6  | 1.942(13) |
| W1          | O7  | 2.064(14) | W1  | O36 | 2.433(12) |
| W2          | O2  | 1.735(14) | W2  | O8  | 2.029(13) |
| W2          | O9  | 1.963(12) | W2  | O37 | 2.380(13) |
| W3          | O7  | 1.855(12) | W3  | O12 | 1.719(15) |
| W3          | O13 | 1.894(13) | W3  | O23 | 1.942(13) |
| W3          | O24 | 1.915(13) | W3  | O36 | 2.532(13) |
| W4          | O6  | 1.923(12) | W4  | O21 | 1.915(14) |
| W4          | O22 | 1.709(14) | W4  | O23 | 1.908(14) |
| W4          | O29 | 1.902(12) | W4  | O36 | 2.399(12) |
| W5          | O20 | 1.701(14) | W5  | O21 | 1.947(14) |
| W5          | O28 | 2.014(12) | W5  | O38 | 2.343(13) |
| W6          | O18 | 1.728(15) | W6  | O17 | 1.956(14) |
| W6          | O27 | 1.999(13) | W6  | O38 | 2.345(14) |
| W7          | O9  | 1.904(12) | W7  | O15 | 1.952(15) |
| W7          | O16 | 1.714(13) | W7  | O17 | 1.895(14) |
| W7          | O26 | 1.940(12) | W7  | O37 | 2.422(13) |
| W8          | O8  | 1.862(13) | W8  | O13 | 1.928(13) |
| W8          | O14 | 1.701(14) | W8  | O15 | 1.902(14) |
| W8          | O25 | 1.903(13) | W8  | O37 | 2.517(14) |
| W9          | O24 | 1.916(13) | W9  | O25 | 1.927(13) |
| W9          | O30 | 1.714(14) | W9  | O31 | 1.906(13) |
| W9          | O35 | 1.899(13) | W9  | O39 | 2.404(13) |
| W10         | O28 | 1.857(13) | W10 | O29 | 1.926(13) |
| W10         | O33 | 1.916(12) | W10 | O34 | 1.701(14) |
| W10         | O35 | 1.951(14) | W10 | O39 | 2.438(13) |
| W11         | O26 | 1.909(13) | W11 | O27 | 1.855(13) |
| W11         | O31 | 1.924(14) | W11 | O32 | 1.722(14) |
| W11         | O33 | 1.929(12) | W11 | O39 | 2.441(13) |
| P1          | O36 | 1.541(13) | P1  | O37 | 1.557(14) |
| P1          | O38 | 1.528(14) | P1  | O39 | 1.561(13) |

**Table S1-continued.**

| Angles (°) |     |     |          |     |     |     |          |
|------------|-----|-----|----------|-----|-----|-----|----------|
| O10        | Pt1 | N2  | 174.6(6) | O5  | Pt1 | N1  | 178.9(6) |
| O11        | Pt2 | N4  | 175.0(7) | O3  | Pt2 | N3  | 178.0(7) |
| O1         | W1  | O3  | 102.8(7) | O1  | W1  | O4  | 101.6(6) |
| O1         | W1  | O6  | 102.8(6) | O1  | W1  | O7  | 94.8(6)  |
| O1         | W1  | O36 | 165.1(6) | O3  | W1  | O4  | 93.9(6)  |
| O3         | W1  | O6  | 92.6(6)  | O3  | W1  | O7  | 162.3(6) |
| O3         | W1  | O36 | 91.5(6)  | O4  | W1  | O6  | 152.7(5) |
| O4         | W1  | O7  | 84.1(6)  | O4  | W1  | O36 | 81.7(5)  |
| O6         | W1  | O7  | 81.7(6)  | O6  | W1  | O36 | 71.6(5)  |
| O7         | W1  | O36 | 70.9(5)  | O2  | W2  | O4  | 103.2(6) |
| O2         | W2  | O5  | 102.0(7) | O2  | W2  | O8  | 99.3(6)  |
| O2         | W2  | O9  | 98.5(6)  | O2  | W2  | O37 | 168.3(6) |
| O4         | W2  | O5  | 94.6(6)  | O4  | W2  | O8  | 87.4(6)  |
| O4         | W2  | O9  | 156.8(5) | O4  | W2  | O37 | 84.2(5)  |
| O5         | W2  | O8  | 157.5(6) | O5  | W2  | O9  | 88.5(6)  |
| O5         | W2  | O37 | 86.2(6)  | O8  | W2  | O9  | 81.3(6)  |
| O8         | W2  | O37 | 71.7(5)  | O9  | W2  | O37 | 73.1(5)  |
| O7         | W3  | O12 | 101.8(6) | O7  | W3  | O13 | 91.1(6)  |
| O7         | W3  | O23 | 87.8(6)  | O7  | W3  | O24 | 154.5(6) |
| O7         | W3  | O36 | 71.6(5)  | O12 | W3  | O13 | 101.9(6) |
| O12        | W3  | O23 | 100.5(6) | O12 | W3  | O24 | 103.5(6) |
| O12        | W3  | O36 | 170.0(5) | O13 | W3  | O23 | 157.3(6) |
| O13        | W3  | O24 | 86.1(6)  | O13 | W3  | O36 | 86.0(5)  |
| O23        | W3  | O24 | 85.3(6)  | O23 | W3  | O36 | 72.2(5)  |
| O24        | W3  | O36 | 82.9(5)  | O6  | W4  | O21 | 88.3(6)  |
| O6         | W4  | O22 | 100.9(6) | O6  | W4  | O23 | 88.1(6)  |
| O6         | W4  | O29 | 157.8(6) | O6  | W4  | O36 | 72.7(5)  |
| O21        | W4  | O22 | 100.0(7) | O21 | W4  | O23 | 157.6(6) |
| O21        | W4  | O29 | 86.5(6)  | O21 | W4  | O36 | 81.8(5)  |
| O22        | W4  | O23 | 102.4(7) | O22 | W4  | O29 | 101.2(6) |
| O22        | W4  | O36 | 173.4(6) | O23 | W4  | O29 | 88.6(6)  |
| O23        | W4  | O36 | 76.0(5)  | O29 | W4  | O36 | 85.2(5)  |
| O11        | W5  | O19 | 96.3(6)  | O11 | W5  | O20 | 100.6(7) |

**Table S1-continued.**

| Angles (°) |    |     |          |     |    |     |          |
|------------|----|-----|----------|-----|----|-----|----------|
| O11        | W5 | O21 | 91.7(6)  | O11 | W5 | O28 | 163.3(6) |
| O11        | W5 | O38 | 84.2(6)  | O19 | W5 | O20 | 99.7(6)  |
| O19        | W5 | O21 | 156.9(6) | O19 | W5 | O28 | 85.2(5)  |
| O19        | W5 | O38 | 72.3(5)  | O20 | W5 | O21 | 100.0(7) |
| O20        | W5 | O28 | 95.4(6)  | O20 | W5 | O38 | 171.2(6) |
| O21        | W5 | O28 | 81.1(6)  | O21 | W5 | O38 | 87.1(5)  |
| O28        | W5 | O38 | 80.4(5)  | O10 | W6 | O17 | 89.6(6)  |
| O10        | W6 | O18 | 101.9(7) | O10 | W6 | O19 | 95.3(6)  |
| O10        | W6 | O27 | 163.4(6) | O10 | W6 | O38 | 84.8(6)  |
| O17        | W6 | O18 | 101.8(7) | O17 | W6 | O19 | 156.5(6) |
| O17        | W6 | O27 | 81.4(6)  | O17 | W6 | O38 | 84.9(6)  |
| O18        | W6 | O19 | 99.7(7)  | O18 | W6 | O27 | 93.7(6)  |
| O18        | W6 | O38 | 170.4(6) | O19 | W6 | O27 | 87.7(6)  |
| O19        | W6 | O38 | 72.7(5)  | O27 | W6 | O38 | 80.5(5)  |
| O9         | W7 | O15 | 87.1(6)  | O9  | W7 | O16 | 101.8(6) |
| O9         | W7 | O17 | 91.7(6)  | O9  | W7 | O26 | 157.1(6) |
| O9         | W7 | O37 | 73.0(5)  | O15 | W7 | O16 | 100.9(6) |
| O15        | W7 | O17 | 155.6(6) | O15 | W7 | O26 | 84.8(6)  |
| O15        | W7 | O37 | 74.3(5)  | O16 | W7 | O17 | 103.1(7) |
| O16        | W7 | O26 | 100.8(6) | O16 | W7 | O37 | 172.9(6) |
| O17        | W7 | O26 | 86.9(6)  | O17 | W7 | O37 | 82.1(6)  |
| O26        | W7 | O37 | 84.1(5)  | O8  | W8 | O13 | 88.1(6)  |
| O8         | W8 | O14 | 101.6(6) | O8  | W8 | O15 | 88.6(6)  |
| O8         | W8 | O25 | 154.0(6) | O8  | W8 | O37 | 71.0(5)  |
| O13        | W8 | O14 | 102.6(6) | O13 | W8 | O15 | 157.1(6) |
| O13        | W8 | O25 | 85.9(6)  | O13 | W8 | O37 | 84.7(5)  |
| O14        | W8 | O15 | 100.4(7) | O14 | W8 | O25 | 104.3(6) |
| O14        | W8 | O37 | 169.7(6) | O15 | W8 | O25 | 87.2(6)  |
| O15        | W8 | O37 | 72.7(5)  | O25 | W8 | O37 | 83.2(5)  |
| O24        | W9 | O25 | 84.2(6)  | O24 | W9 | O30 | 102.5(6) |
| O24        | W9 | O31 | 155.4(6) | O24 | W9 | O35 | 89.8(6)  |
| O24        | W9 | O39 | 83.9(5)  | O25 | W9 | O30 | 102.2(6) |
| O25        | W9 | O31 | 87.1(6)  | O25 | W9 | O35 | 155.9(6) |

**Table S1-continued.**

| Angles (°) |     |     |          |     |     |     |          |
|------------|-----|-----|----------|-----|-----|-----|----------|
| O25        | W9  | O39 | 83.3(5)  | O30 | W9  | O31 | 101.8(6) |
| O30        | W9  | O35 | 101.9(6) | O30 | W9  | O39 | 171.9(6) |
| O31        | W9  | O35 | 89.0(6)  | O31 | W9  | O39 | 72.3(5)  |
| O35        | W9  | O39 | 72.9(5)  | O28 | W10 | O29 | 87.5(6)  |
| O28        | W10 | O33 | 91.9(6)  | O28 | W10 | O34 | 102.5(7) |
| O28        | W10 | O35 | 153.9(6) | O28 | W10 | O39 | 83.3(5)  |
| O29        | W10 | O33 | 156.1(6) | O29 | W10 | O34 | 100.3(6) |
| O29        | W10 | O35 | 83.7(6)  | O29 | W10 | O39 | 82.6(5)  |
| O33        | W10 | O34 | 103.2(6) | O33 | W10 | O35 | 86.5(6)  |
| O33        | W10 | O39 | 73.6(5)  | O34 | W10 | O35 | 103.2(6) |
| O34        | W10 | O39 | 173.6(6) | O35 | W10 | O39 | 71.3(5)  |
| O26        | W11 | O27 | 87.9(6)  | O26 | W11 | O31 | 85.7(6)  |
| O26        | W11 | O32 | 100.2(6) | O26 | W11 | O33 | 157.6(5) |
| O26        | W11 | O39 | 84.3(5)  | O27 | W11 | O31 | 153.6(6) |
| O27        | W11 | O32 | 104.2(6) | O27 | W11 | O33 | 89.9(6)  |
| O27        | W11 | O39 | 82.8(5)  | O31 | W11 | O32 | 102.1(6) |
| O31        | W11 | O33 | 86.4(6)  | O31 | W11 | O39 | 71.1(5)  |
| O32        | W11 | O33 | 101.9(6) | O32 | W11 | O39 | 171.7(6) |
| O33        | W11 | O39 | 73.3(5)  | O36 | P1  | O37 | 109.5(8) |
| O36        | P1  | O38 | 110.6(7) | O36 | P1  | O39 | 108.3(7) |
| O37        | P1  | O38 | 110.0(8) | O37 | P1  | O39 | 108.2(7) |
| O38        | P1  | O39 | 110.2(8) | W1  | O7  | W3  | 127.4(7) |
| W1         | O6  | W4  | 125.2(6) | W2  | O9  | W7  | 123.5(7) |
| W2         | O8  | W8  | 126.7(7) | W7  | O15 | W8  | 125.1(7) |
| W3         | O13 | W8  | 150.0(8) | W3  | O23 | W4  | 124.3(7) |
| W6         | O17 | W7  | 153.6(8) | W8  | O25 | W9  | 152.6(7) |
| W4         | O21 | W5  | 152.6(7) | W6  | O27 | W11 | 154.2(8) |
| W3         | O24 | W9  | 152.3(8) | W4  | O29 | W10 | 148.7(8) |
| W7         | O26 | W11 | 147.6(7) | W10 | O33 | W11 | 124.6(7) |
| W5         | O28 | W10 | 153.5(8) | W1  | O36 | W3  | 90.1(4)  |
| W9         | O31 | W11 | 126.5(7) | W1  | O36 | P1  | 125.7(7) |
| W9         | O35 | W10 | 125.6(7) | W3  | O36 | P1  | 124.3(7) |
| W1         | O36 | W4  | 90.5(4)  | W2  | O37 | W7  | 90.4(5)  |

**Table S1-continued.**

| Angles (°) |     |     |          |     |     |     |          |
|------------|-----|-----|----------|-----|-----|-----|----------|
| W3         | O36 | W4  | 87.3(4)  | W2  | O37 | P1  | 125.0(7) |
| W4         | O36 | P1  | 127.1(7) | W7  | O37 | P1  | 126.7(8) |
| W2         | O37 | W8  | 90.5(5)  | W5  | O38 | W6  | 91.8(5)  |
| W7         | O37 | W8  | 87.6(4)  | W6  | O38 | P1  | 128.6(7) |
| W8         | O37 | P1  | 125.2(8) | W9  | O39 | W11 | 89.8(4)  |
| W5         | O38 | P1  | 127.1(8) | W10 | O39 | W11 | 88.5(5)  |
| W9         | O39 | W10 | 90.0(5)  | W11 | O39 | P1  | 123.5(8) |
| W9         | O39 | P1  | 129.3(8) | W10 | O39 | P1  | 123.9(7) |

**Table S2.** Bond valence sum (BVS) calculation for Cs-1.

|     | <b>BVS</b> |     | <b>BVS</b> |
|-----|------------|-----|------------|
| W1  | 5.946      | W2  | 6.148      |
| W3  | 6.083      | W4  | 6.082      |
| W5  | 6.234      | W6  | 6.020      |
| W7  | 5.933      | W8  | 6.201      |
| W9  | 6.055      | W10 | 6.104      |
| W11 | 6.090      | P1  | 4.836      |
| O1  | 1.740      | O2  | 1.635      |
| O3  | 2.436      | O4  | 2.021      |
| O5  | 2.499      | O6  | 1.919      |
| O7  | 1.855      | O8  | 1.899      |
| O9  | 1.919      | O10 | 2.349      |
| O11 | 2.506      | O12 | 1.708      |
| O13 | 2.035      | O14 | 1.793      |
| O15 | 1.951      | O16 | 1.731      |
| O17 | 1.961      | O18 | 1.667      |
| O19 | 1.964      | O20 | 1.793      |
| O21 | 1.928      | O22 | 1.754      |
| O23 | 1.959      | O24 | 2.008      |
| O25 | 2.012      | O26 | 1.962      |
| O27 | 1.984      | O28 | 1.945      |
| O29 | 2.017      | O30 | 1.731      |
| O31 | 2.011      | O32 | 1.694      |
| O33 | 1.971      | O34 | 1.793      |
| O35 | 1.962      | O36 | 1.937      |
| O37 | 1.912      | O38 | 1.903      |
| O39 | 1.919      |     |            |

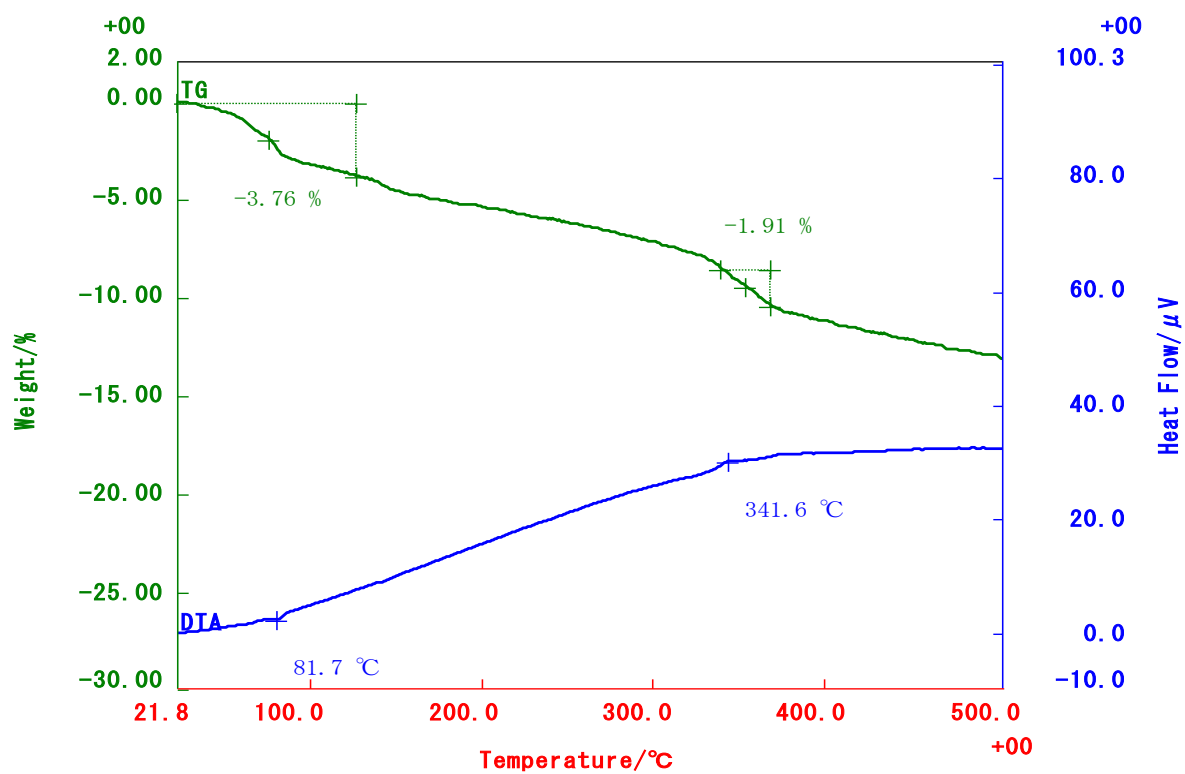

Fig. S1



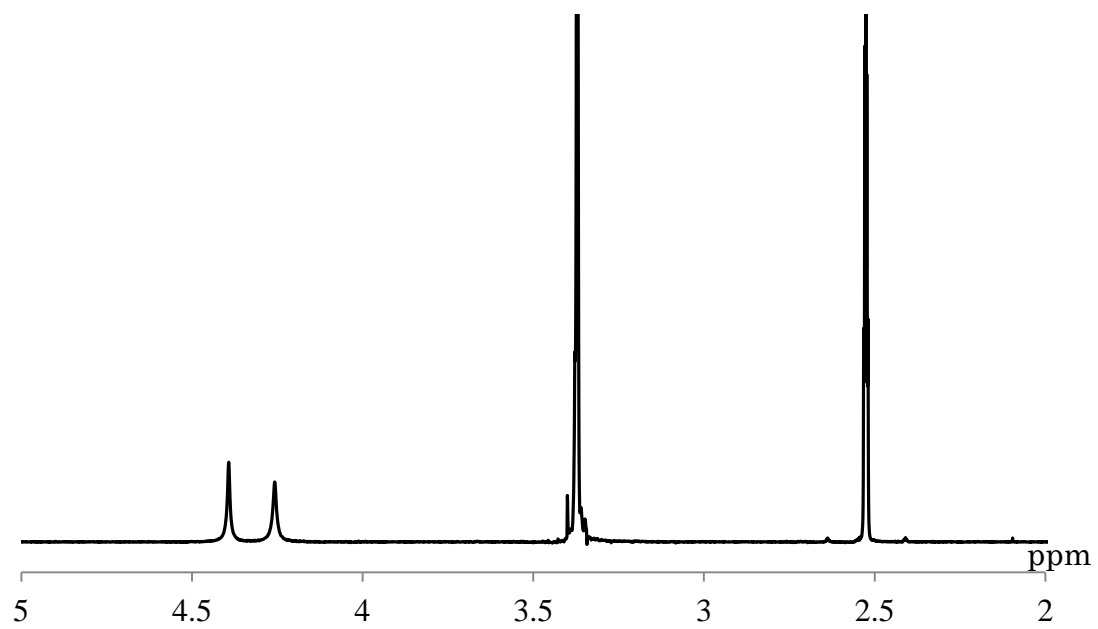

Fig. S2

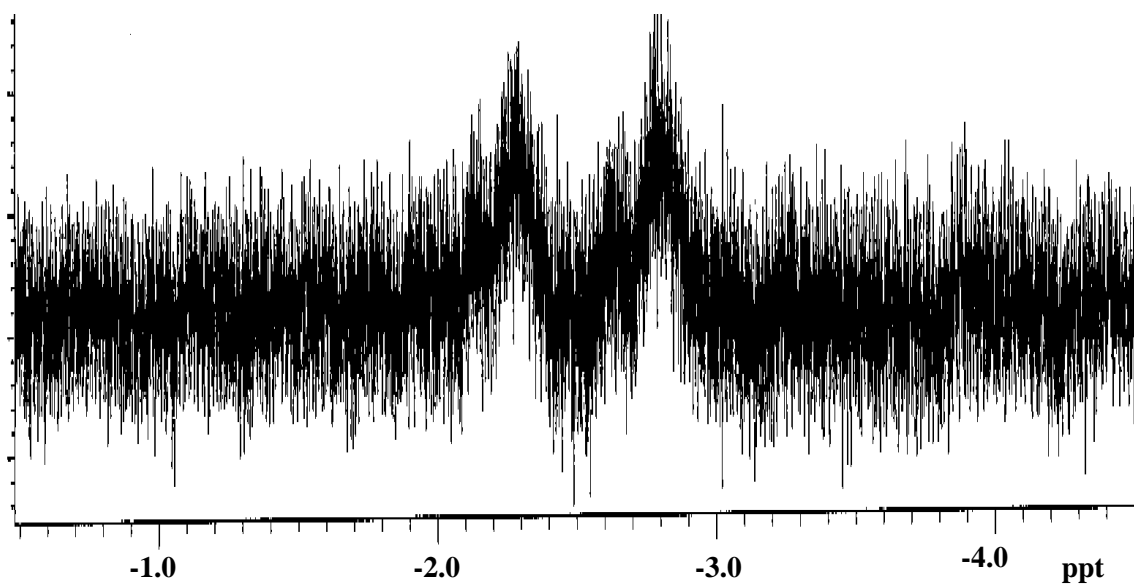

Fig. S3

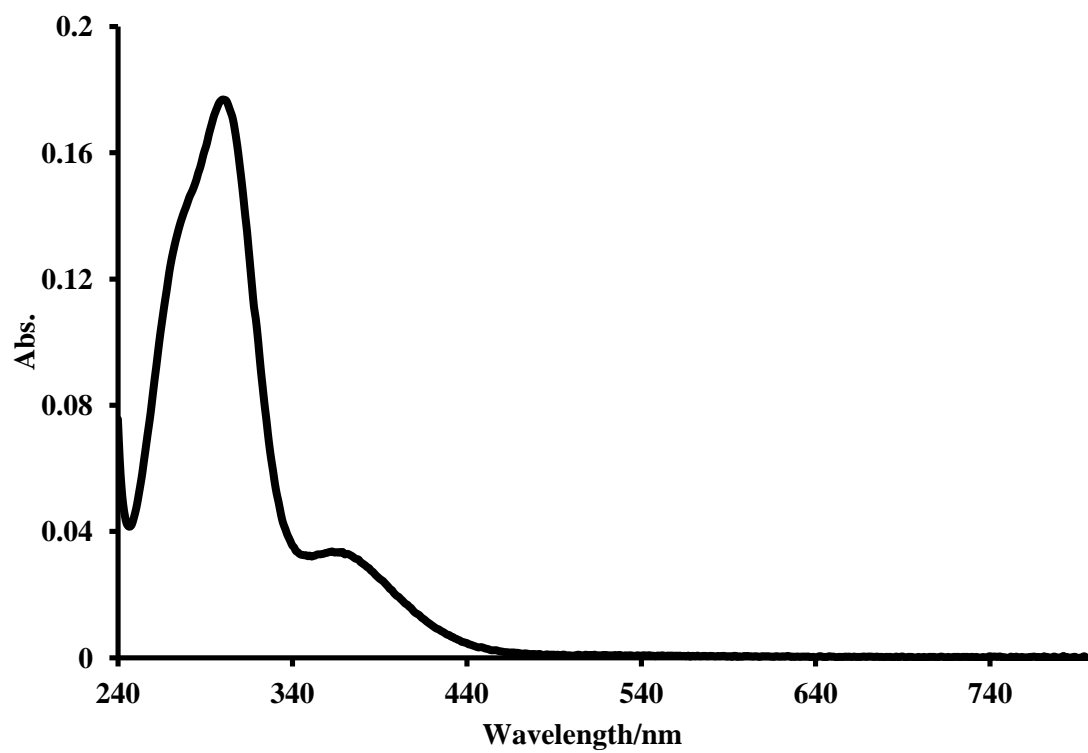

Fig. S4
